# Supplementary material for: Development and validation of a predictive model combining patient-reported outcome measures, spirometry and exhaled nitric oxide fraction for asthma diagnosis
Source: PubMed Central journal article supplement — ERJ Open Res. 2023 Feb 6;9(1):00451-2022. doi: 10.1183/23120541.00451-2022 (PMC9900444; doi:10.1183/23120541.00451-2022), 2023-02-06

**Supplementary Table 1: Comparison between asthmatic and non-asthmatic demographic, functional and inflammatory characteristics in the validation cohort**

|                                  | Validation cohort (N=137) |                  |
|----------------------------------|---------------------------|------------------|
|                                  | Non-Asthmatic (n=57)      | Asthmatic (n=80) |
| Age (years)                      | 53 ± 14                   | 50 ± 16          |
| Gender (male)                    | 39% (22)                  | 35% (28)         |
| BMI (kg/m <sup>2</sup> )         | 26 ± 4.5                  | 26 ± 5.2         |
| Non-Smoker                       | 58% (33)                  | 46% (37)         |
| Ex-Smoker                        | 31% (18)                  | 30% (24)         |
| Smoker                           | 11% (6)                   | 24% (19)         |
| Atopy                            | 39% (22)                  | 48% (38)         |
| FEV1 % pred.                     | 101 ± 2.31                | 89.3 ± 1.62      |
| FEV1 < 80 % pred.                | 11% (6)                   | 20% (16)         |
| FEV1/FVC %                       | 81.3 ± 0.92               | 76.9 ± 0.09      |
| FEV1/FVC < 75 %                  | 17% (10)                  | 34% (27)         |
| FeNO (ppb)                       | 19 (13.2-27.8)            | 19 (12-32)       |
| FeNO (ppb) > 25                  | 31% (18)                  | 33% (26)         |
| Sputum eosinophils % &           | 1.1 (0.4-2.1)             | 0.8 (0.2-4.4)    |
| Blood eosinophils %              | 1.9 (1.02-3.2)            | 2.2 (1.3-2.9)    |
| Blood eosinophils (1/μL)         | 160 (60-240)              | 160 (90-250)     |
| Blood eosinophils (1/μL) > 300   | 12% (7)                   | 18% (14)         |
| Total serum IgE (KU/L)           | 75 (26.8-118)             | 89 (29.6-205)    |
| Wheezing intensity score         | 0.82 ± 0.14               | 1.45 ± 0.12      |
| Dyspnea intensity score          | 1.54 ± 0.15               | 2.24 ± 0.13      |
| Chest tightness intensity score  | 1.4 ± 0.15                | 1.79 ± 0.12      |
| Airway secretion intensity score | 1.25 ± 0.14               | 1.42 ± 0.14      |
| Cough intensity score            | 1.60 ± 0.15               | 2.04 ± 0.11      |

Results are expressed as percentage (n), mean (±SD) or median (IQR).

& n=57 in asthmatics and n=38 in non-asthmatics

Abbreviations: FEV1, forced expiratory volume in 1 second; FVC, forced vital capacity; FeNO, fraction of exhaled nitric oxide.

**Table S2. Multivariate logistic regression on Training data (n=166)**  
**OR (95% CI)**

|         |              |                    |
|---------|--------------|--------------------|
| Model 1 | Cough        | 0.747(0.49-1.13)   |
|         | Secretion    | 1.354(0.92-2.02)   |
|         | Oppression   | 0.76(0.52-1.10)    |
|         | Dyspnea      | 1.19(0.80-1.78)    |
|         | Wheezing     | 1.78**(1.23-2.63)  |
|         | FeNO         | 1.02(0.99-1.04)    |
| Model 2 | Cough        | 0.71(0.45-1.10)    |
|         | Secretion    | 1.36(0.91-2.06)    |
|         | Oppression   | 0.82(0.55-1.21)    |
|         | Dyspnea      | 0.99(0.64-1.52)    |
|         | Wheezing     | 1.77**(1.21-2.66)  |
|         | FEV1(%)      | 0.95***(0.93-0.98) |
| Model 3 | FeNO         | 1.02*(1.00-1.04)   |
|         | Cough        | 0.78(0.50-1.19)    |
|         | Secretion    | 1.34(0.89-2.04)    |
|         | Oppression   | 0.82(0.55-1.19)    |
|         | Dyspnea      | 1.15(0.76-1.73)    |
|         | Wheezing     | 1.62*(1.11-2.43)   |
| Model 4 | FEV1/FVC (%) | 0.91**(0.86-0.96)  |
|         | FeNO         | 1.01(0.99-1.04)    |
|         | Cough        | 0.74(0.47-1.15)    |
|         | Secretion    | 1.34(0.89-2.06)    |
|         | Oppression   | 0.85(0.57-1.24)    |
|         | Dyspnea      | 1.02(0.66-1.56)    |
| Model 4 | Wheezing     | 1.68*(1.14-2.53)   |
|         | FEV1(%)      | 0.96*(0.93-0.99)   |
|         | FEV1/FVC (%) | 0.95(0.89-1.01)    |
|         | FeNO         | 1.02(0.99-1.04)    |

\*\* significant at 0.01 \* significant at 0.05

Abbreviations: FEV1, forced expiratory volume in 1 second; FVC, forced vital capacity; FeNO, fraction of exhaled nitric oxide.

**Table S3 Diagnostic performance of the models derived from the training cohort and applied to the validation cohort**

|         | AUC<br>(95% CI)     | Threshold | Sensitivity<br>(95% CI) | Specificity<br>(95% CI) | NPV  | PPV  |
|---------|---------------------|-----------|-------------------------|-------------------------|------|------|
| Model 1 | 0.60(0.49-0.70)     | 0.48      | 0.72(0.50-0.85)         | 0.48(0.28-0.63)         | 0.56 | 0.65 |
| Model 2 | 0.66(0.57-0.76)     | 0.51      | 0.69(0.40-0.82)         | 0.60(0.36-0.73)         | 0.59 | 0.69 |
| Model 3 | 0.69(0.76-0.59)0.78 | 0.76      | 0.44(0.11-0.54)         | 0.92(0.63-0.98)         | 0.56 | 0.88 |
| Model 4 | 0.69(0.60-0.79)     | 0.77      | 0.41(0.22-0.54)         | 0.92(0.71-0.98)         | 0.54 | 0.87 |

**Supplementary Figure 1: Radar plots showing asthma symptom intensity scales between asthmatics and non-asthmatics in the training cohort (n=166)**

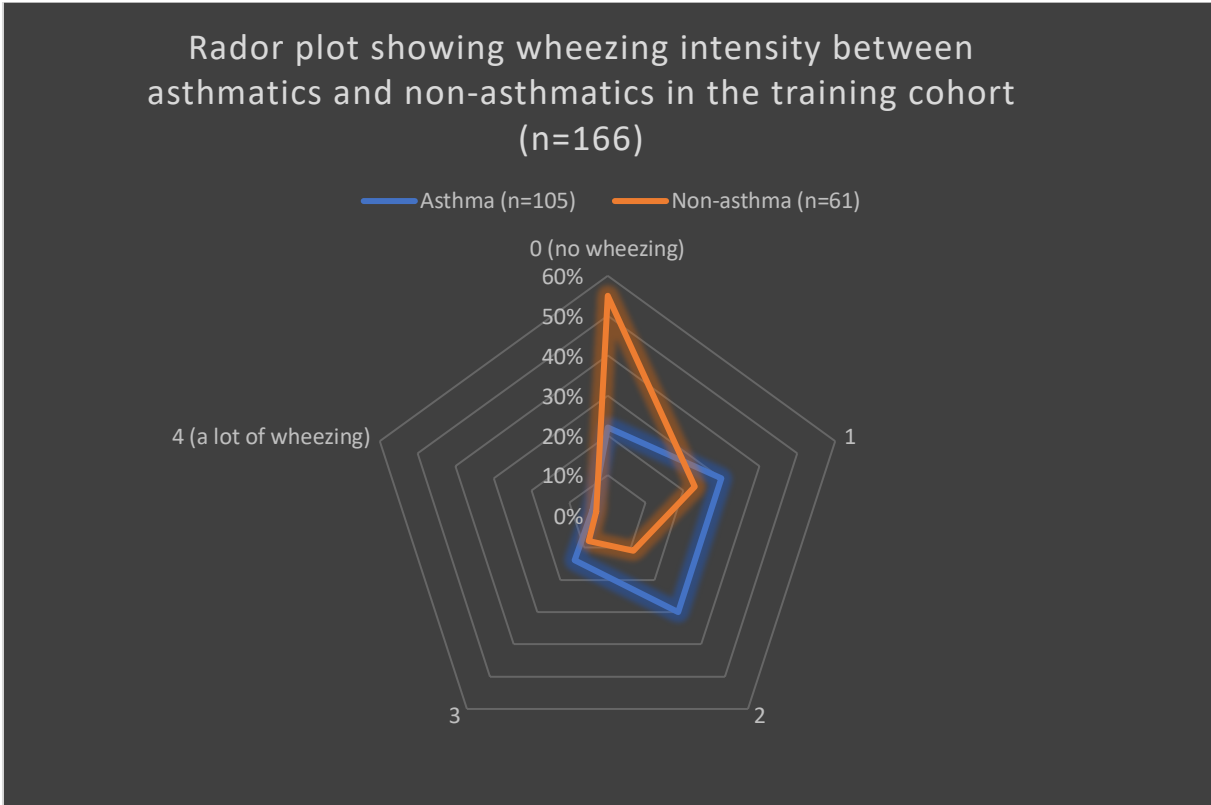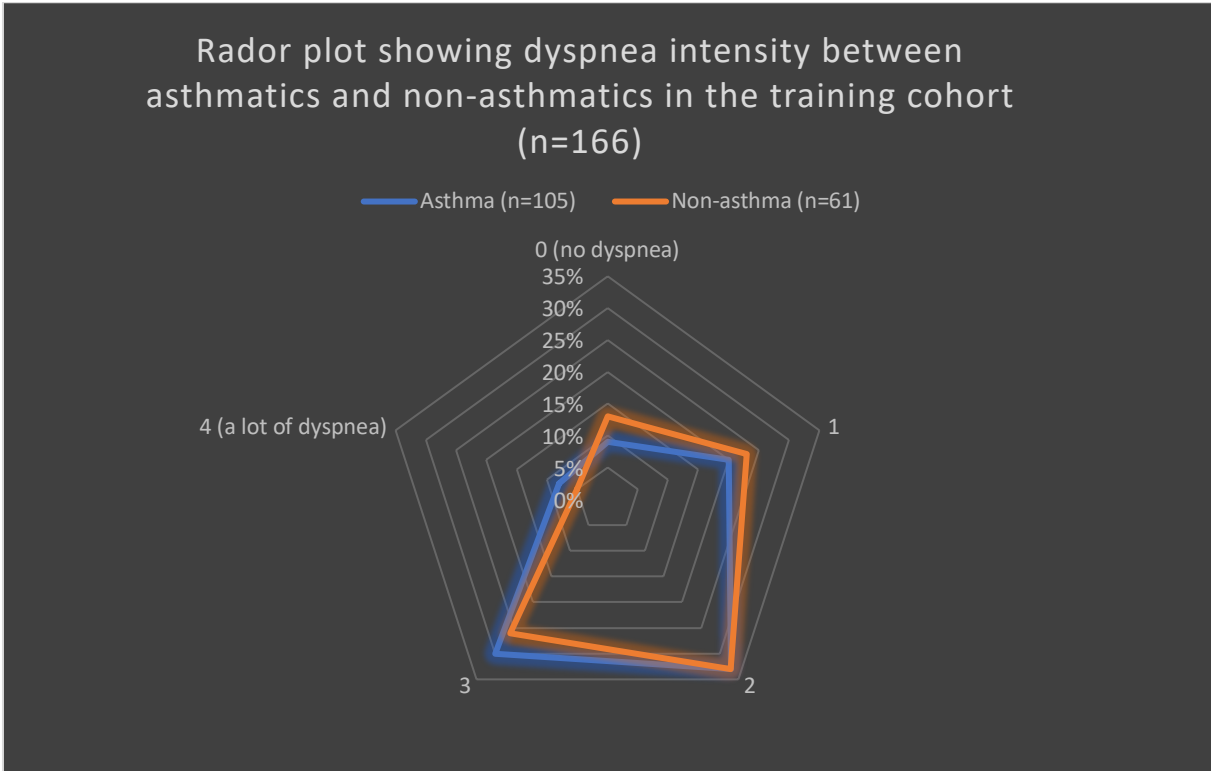

Radar plot showing cough intensity between asthmatics and non-asthmatics in the training cohort (n=166)

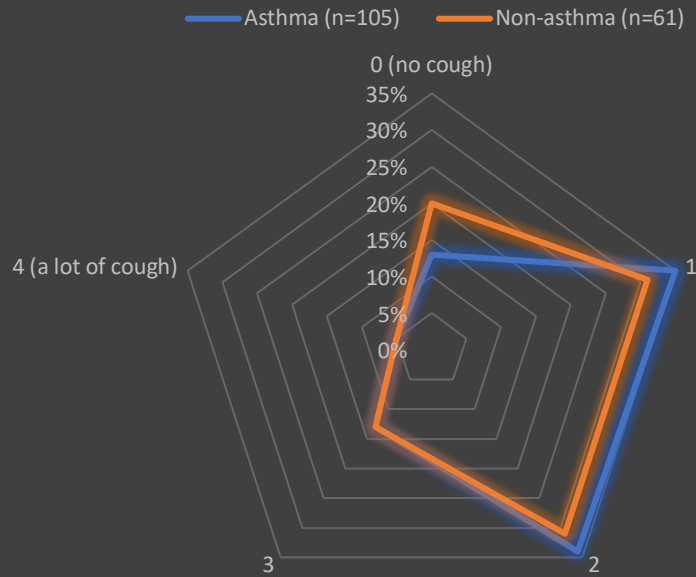

Radar plot showing airway secretion intensity between asthmatics and non-asthmatics in the training cohort (n=166)

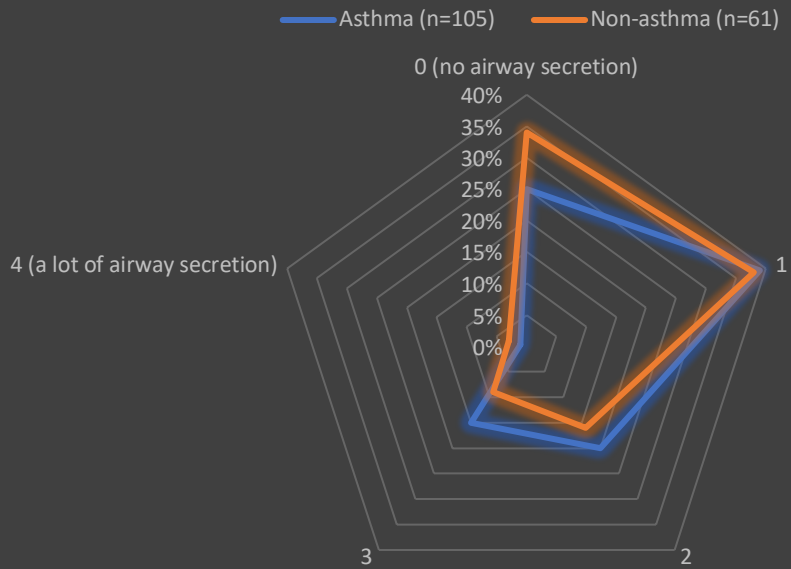

Radar plot showing chest tightness intensity between asthmatics and non-asthmatics in the training cohort (n=166)

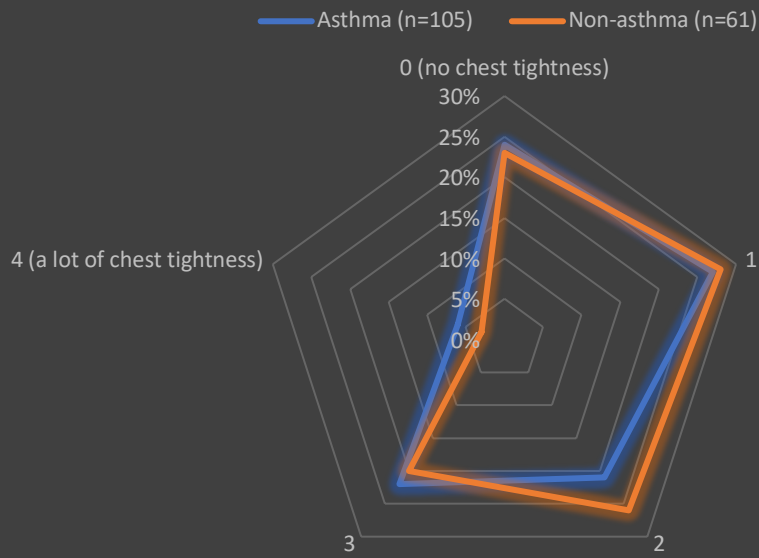

Supplement: 00451-2022.supplement.pdf [file 00451-2022.supplement.pdf]
